# Supplementary material for: Human Blood Serum Inhibits Ductal Carcinoma Cells BT474 Growth and Modulates Effect of HER2 Inhibition
Source: MDPI journal article supplement (doi:10.3390/biomedicines10081914), 2022-08-08
Supplement: s1 [file s1]

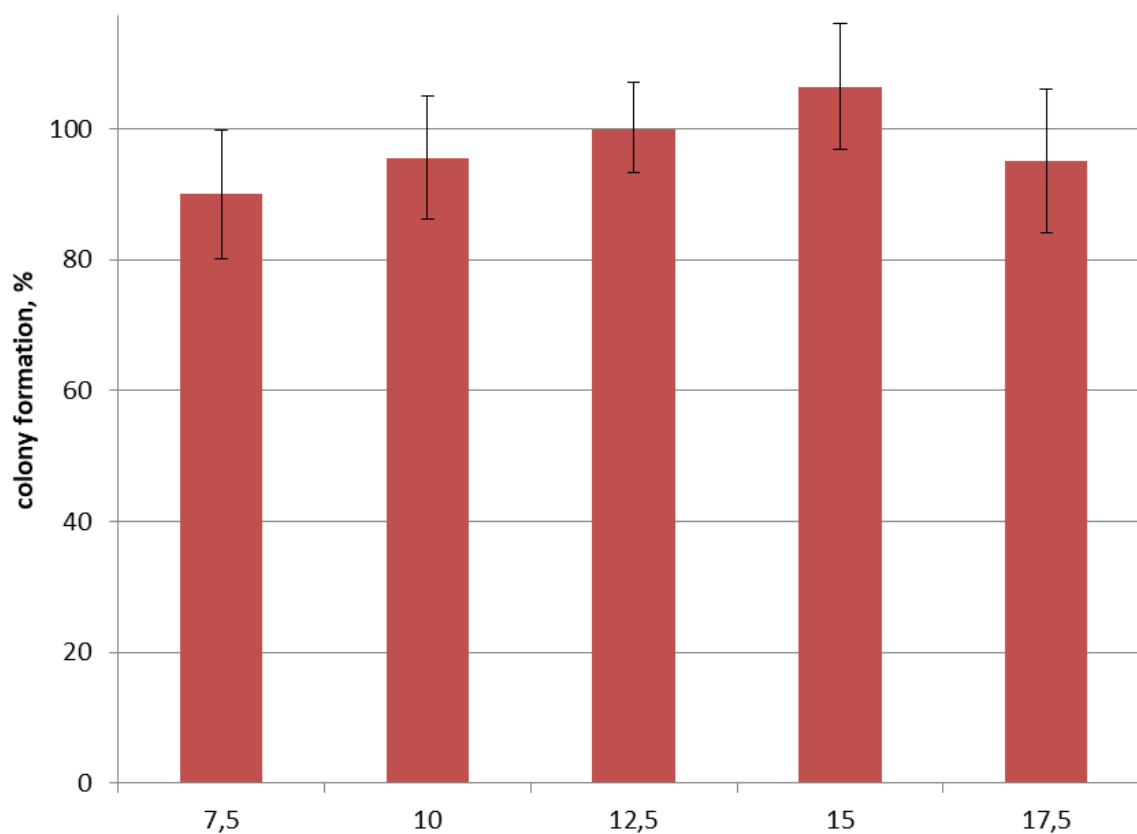

**Figure S1.** Colony formation by BT474 cells in the growth media containing with 7.5 – 17.5% of heat-inactivated FBS. Colony formation is normalized to the growth media containing 12.5% FBS. The data is presented as mean  $\pm$  standard deviation from three independent replicates.

**Table S1.** Age of blood donors.

| Healthy donors | age, years |  | BC patients | age, years |
|----------------|------------|--|-------------|------------|
| Sd1            | 40         |  | sp1         | 68         |
| Sd2            | 21         |  | sp2         | 69         |
| Sd3            | 45         |  | sp3         | 63         |
| Sd4            | 64         |  | sp4         | 48         |
| Sd5            | 38         |  | sp5         | 72         |
| Sd6            | 54         |  | sp7         | 41         |
| Sd7            | 35         |  | sp8         | 36         |
| Sd8            | 59         |  | sp9         | 55         |
| Sd9            | 30         |  | sp10        | 43         |

|      |    |  |      |    |
|------|----|--|------|----|
| Sd10 | 38 |  | sp11 | 49 |
| Sm 1 | 53 |  | sp12 | 53 |
| sd12 | 53 |  | sp13 | 52 |
| sd13 | 32 |  | sp14 | 37 |
| sd13 | 33 |  | sp15 | 36 |
| sd14 | 21 |  | sp16 | 32 |
| sd15 | 32 |  | sp17 | 62 |
| sd16 | 33 |  | sp18 | 31 |
|      |    |  | sp19 | 50 |
|      |    |  | sp20 | 50 |
|      |    |  | sp21 | 61 |
|      |    |  | sp22 | 55 |
|      |    |  | sp23 | 38 |
|      |    |  | sp24 | 60 |
|      |    |  | sp25 | 70 |
|      |    |  | sp26 | 60 |
|      |    |  | sp27 | 61 |
|      |    |  | sp28 | 72 |
|      |    |  | sp29 | 72 |
|      |    |  | sp30 | 62 |
|      |    |  | sp31 | 52 |
|      |    |  | sp32 | 63 |
|      |    |  | sp34 | 56 |
|      |    |  | sp35 | 53 |

**Table S2.** Colony formation of BT474 cells in the presence of trastuzumab and 2.5% healthy human serum (samples sd) or HER2 positive BC patients (sp). The number of colonies in each experiment is normalized by number of colonies in the absence of the drug and human serum. The data are given as mean  $\pm$  standard deviation.

| Serum sample | no drug         | Trastuzumab, 0.5 $\mu$ g/ml | Bliss Synergy Score |
|--------------|-----------------|-----------------------------|---------------------|
| FBS          | 100 $\pm$ 9.7   | 51 $\pm$ 3.2                |                     |
| Sm1          | 23.3 $\pm$ 3.2  | 13.4 $\pm$ 3.2              | -1.52141            |
| Sd1          | 53.26 $\pm$ 7.2 | 19.15 $\pm$ 3.2             | 8.017635            |
| Sd2          | 44.66 $\pm$ 5.7 | 31.05 $\pm$ 3.7             | -8.28068            |
| Sd3          | 59.46 $\pm$ 4.8 | 9.95 $\pm$ 2.8              | 20.3762             |
| Sd4          | 39.65 $\pm$ 5.5 | 8.7 $\pm$ 3.5               | 11.52498            |

|       |             |             |          |
|-------|-------------|-------------|----------|
| Sd5   | 42.47 ± 6.3 | 15.68 ± 3.3 | 5.980582 |
| Sd6   | 49.14 ± 6.2 | 12.81 ± 3.2 | 12.246   |
| Sd7   | 38.58 ± 5.8 | 15.04 ± 3.8 | 4.639139 |
| Sd8   | 42.65 ± 6.7 | 53.8 ± 3.7  | -32.0456 |
| Sd9   | 78.34 ± 7.3 | 13.25 ± 3.3 | 26.70103 |
| Sd10  | 70.76 ± 7.3 | 14 ± 3.3    | 22.08804 |
| Sd12  | 60.21 ± 6.8 | 9.2 ± 2.8   | 21.50933 |
| Sd13  | 62.2 ± 7.6  | 11.76 ± 3.6 | 19.96289 |
| Sd14  | 35.41 ± 3.2 | 13.27 ± 3.2 | 4.795251 |
| Sd15  | 88.07 ± 7.3 | 20.65 ± 3.3 | 24.26283 |
| Sd16  | 60.82 ± 7.1 | 17.7 ± 3.4  | 13.31647 |
| sd13b | 65.65 ± 6.8 | 38.94 ± 3.4 | -5.46211 |
| Sp1   | 46.99 ± 6.1 | 10.92 ± 3.4 | 13.04111 |
| Sp2   | 67.67 ± 7.4 | 15.74 ± 3.2 | 18.7749  |
| Sp3   | 60.37 ± 7.9 | 11.85 ± 3.3 | 18.9401  |
| Sp4   | 49.27 ± 6.4 | 13.51 ± 3.6 | 11.61259 |
| Sp5   | 42.73 ± 6.7 | 15 ± 3.1    | 6.796779 |
| Sp 7  | 81.51 ± 9   | 23.14 ± 4.5 | 18.427   |
| Sp 8  | 76.34 ± 7.6 | 31.84 ± 3.7 | 7.089096 |
| Sp 9  | 38.02 ± 6.5 | 17.59 ± 3.7 | 1.800825 |
| Sp 10 | 71.62 ± 7.6 | 23.7 ± 4.6  | 12.83068 |
| Sp 11 | 49.57 ± 6   | 20.73 ± 4.7 | 4.547621 |
| Sp 12 | 72.53 ± 7.4 | 18.14 ± 3.8 | 18.8499  |
| Sp 13 | 51.7 ± 6.1  | 15.18 ± 3.7 | 11.18726 |
| Sp 14 | 72.69 ± 7.3 | 17.64 ± 3.1 | 19.43229 |
| sp15  | 67.69 ± 7.1 | 13.87 ± 3.7 | 20.65468 |
| sp16  | 56.29 ± 6.9 | 9.05 ± 3.2  | 19.66397 |
| sp17  | 38.76 ± 6   | 11.76 ± 3.2 | 8.011188 |
| sp18  | 77.53 ± 7.4 | 16.81 ± 3.2 | 22.73081 |
| sp19  | 68.91 ± 7.3 | 3.69 ± 3.2  | 31.45288 |
| sp20  | 64.61 ± 7.9 | 8.44 ± 3    | 24.50757 |
| sp21  | 61 ± 7.2    | 13.28 ± 2.1 | 17.83336 |
| sp22  | 55 ± 6.8    | 5.75 ± 1.4  | 22.29679 |

|      |                 |                 |          |
|------|-----------------|-----------------|----------|
| sp23 | $26.49 \pm 4.7$ | $6.2 \pm 2.2$   | 7.315429 |
| sp24 | $24.25 \pm 3.3$ | $4.43 \pm 1.3$  | 7.943856 |
| sp25 | $52.24 \pm 4.3$ | $7.97 \pm 2.6$  | 18.67581 |
| sp26 | $28.36 \pm 5.8$ | $10.62 \pm 3.1$ | 3.841375 |
| sp27 | $60.02 \pm 6.6$ | $26.55 \pm 3.5$ | 4.055292 |
| sp28 | $35.54 \pm 3.2$ | $15.05 \pm 2.7$ | 3.078314 |
| sp29 | $8.21 \pm 2.3$  | $1.77 \pm 1.7$  | 2.416348 |
| sp30 | $45.77 \pm 3.2$ | $20.8 \pm 2.6$  | 2.540985 |
| sp31 | $58.07 \pm 5.1$ | $10.62 \pm 1.7$ | 18.99291 |
| sp32 | $53.74 \pm 5.4$ | $5.31 \pm 1.8$  | 22.09902 |
| sp34 | $28.73 \pm 3.3$ | $17.7 \pm 2.7$  | -3.0492  |
| sp35 | $66 \pm 5.2$    | $17.7 \pm 2.1$  | 15.95876 |
